# Supplementary material
Source: publisher figshare collection journal article supplement (https://acs.figshare.com/ndownloader/files/3950452)
Supplement: Supplementary file 1 [file 3950452]

 
data_e:\hp\hpx4\struct\finished\hpx4 
 
_audit_creation_method            SHELXL-97 
_chemical_name_systematic 
; 
 ? 
; 
_chemical_name_common             ? 
_chemical_melting_point           ? 
_chemical_formula_moiety          ? 
_chemical_formula_sum 
 'C33 H40 O4' 
_chemical_formula_weight          500.65 
 
loop_ 
 _atom_type_symbol 
 _atom_type_description 
 _atom_type_scat_dispersion_real 
 _atom_type_scat_dispersion_imag 
 _atom_type_scat_source 
 'C'  'C'   0.0033   0.0016 
 'International Tables Vol C Tables 4.2.6.8 and 6.1.1.4' 
 'H'  'H'   0.0000   0.0000 
 'International Tables Vol C Tables 4.2.6.8 and 6.1.1.4' 
 'O'  'O'   0.0106   0.0060 
 'International Tables Vol C Tables 4.2.6.8 and 6.1.1.4' 
 
_symmetry_cell_setting            ? 
_symmetry_space_group_name_H-M    ? 
 
loop_ 
 _symmetry_equiv_pos_as_xyz 
 'x, y, z' 
 '-x, y+1/2, -z+1/2' 
 '-x, -y, -z' 
 'x, -y-1/2, z-1/2' 
 
_cell_length_a                    15.2492(4) 
_cell_length_b                    7.6175(2) 
_cell_length_c                    23.1871(6) 
_cell_angle_alpha                 90.00 
_cell_angle_beta                  91.092(2) 
_cell_angle_gamma                 90.00 
_cell_volume                      2692.94(12) 
_cell_formula_units_Z             4 
_cell_measurement_temperature     173(2) 
_cell_measurement_reflns_used     ? 
_cell_measurement_theta_min       ? 
_cell_measurement_theta_max       ? 
 
_exptl_crystal_description        ? 
_exptl_crystal_colour             ? 
_exptl_crystal_size_max           ? 
_exptl_crystal_size_mid           ? 
_exptl_crystal_size_min           ? 
_exptl_crystal_density_meas       ? 
_exptl_crystal_density_diffrn     1.235 
_exptl_crystal_density_method     'not measured' 
_exptl_crystal_F_000              1080 
_exptl_absorpt_coefficient_mu     0.079 
_exptl_absorpt_correction_type    ? 
_exptl_absorpt_correction_T_min   ? 
_exptl_absorpt_correction_T_max   ? 
_exptl_absorpt_process_details    ? 
 
_exptl_special_details 
; 
 ? 
; 
 
_diffrn_ambient_temperature       173(2) 
_diffrn_radiation_wavelength      0.71073 
_diffrn_radiation_type            MoK\a 
_diffrn_radiation_source          'fine-focus sealed tube' 
_diffrn_radiation_monochromator   graphite 
_diffrn_measurement_device_type   ? 
_diffrn_measurement_method        ? 
_diffrn_detector_area_resol_mean  ? 
_diffrn_standards_number          ? 
_diffrn_standards_interval_count  ? 
_diffrn_standards_interval_time   ? 
_diffrn_standards_decay_%         ? 
_diffrn_reflns_number             30824 
_diffrn_reflns_av_R_equivalents   0.0508 
_diffrn_reflns_av_sigmaI/netI     0.0506 
_diffrn_reflns_limit_h_min        -19 
_diffrn_reflns_limit_h_max        19 
_diffrn_reflns_limit_k_min        -9 
_diffrn_reflns_limit_k_max        10 
_diffrn_reflns_limit_l_min        -31 
_diffrn_reflns_limit_l_max        31 
_diffrn_reflns_theta_min          2.67 
_diffrn_reflns_theta_max          29.04 
_reflns_number_total              6563 
_reflns_number_gt                 4777 
_reflns_threshold_expression      >2sigma(I) 
 
_computing_data_collection        ? 
_computing_cell_refinement        ? 
_computing_data_reduction         ? 
_computing_structure_solution     'SHELXS-97 (Sheldrick, 1990)' 
_computing_structure_refinement   'SHELXL-97 (Sheldrick, 1997)' 
_computing_molecular_graphics     ? 
_computing_publication_material   ? 
 
_refine_special_details 
; 
 Refinement of F^2^ against ALL reflections.  The weighted R-factor wR and 
 goodness of fit S are based on F^2^, conventional R-factors R are based 
 on F, with F set to zero for negative F^2^. The threshold expression of 
 F^2^ > 2sigma(F^2^) is used only for calculating R-factors(gt) etc. and is 
 not relevant to the choice of reflections for refinement.  R-factors based 
 on F^2^ are statistically about twice as large as those based on F, and R- 
 factors based on ALL data will be even larger. 
; 
 
_refine_ls_structure_factor_coef  Fsqd  
_refine_ls_matrix_type            full 
_refine_ls_weighting_scheme       calc  
_refine_ls_weighting_details 
 'calc w=1/[\s^2^(Fo^2^)+(0.0439P)^2^+1.0844P] where P=(Fo^2^+2Fc^2^)/3' 
_atom_sites_solution_primary      direct 
_atom_sites_solution_secondary    difmap 
_atom_sites_solution_hydrogens    geom 
_refine_ls_hydrogen_treatment     mixed 
_refine_ls_extinction_method      none 
_refine_ls_extinction_coef        ? 
_refine_ls_number_reflns          6563 
_refine_ls_number_parameters      342 
_refine_ls_number_restraints      0 
_refine_ls_R_factor_all           0.0789 
_refine_ls_R_factor_gt            0.0510 
_refine_ls_wR_factor_ref          0.1224 
_refine_ls_wR_factor_gt           0.1069 
_refine_ls_goodness_of_fit_ref    1.021 
_refine_ls_restrained_S_all       1.021 
_refine_ls_shift/su_max           0.000 
_refine_ls_shift/su_mean          0.000 
 
loop_ 
 _atom_site_label 
 _atom_site_type_symbol 
 _atom_site_fract_x 
 _atom_site_fract_y 
 _atom_site_fract_z 
 _atom_site_U_iso_or_equiv 
 _atom_site_adp_type 
 _atom_site_occupancy 
 _atom_site_symmetry_multiplicity 
 _atom_site_calc_flag 
 _atom_site_refinement_flags 
 _atom_site_disorder_assembly 
 _atom_site_disorder_group 
O1 O 0.02418(7) 0.08823(14) 0.05195(5) 0.0243(3) Uani 1 1 d . . . 
O2 O 0.12910(7) 0.10947(15) 0.18036(5) 0.0270(3) Uani 1 1 d . . . 
O3 O 0.11599(7) -0.25998(15) 0.01536(4) 0.0239(3) Uani 1 1 d . . . 
H3 H 0.0845 -0.1833 -0.0008 0.029 Uiso 1 1 calc R . . 
O4 O 0.30627(8) -0.34053(16) 0.17837(5) 0.0315(3) Uani 1 1 d . . . 
C8 C 0.10262(9) -0.11987(19) 0.11014(6) 0.0171(3) Uani 1 1 d . . . 
C28 C -0.05379(10) -0.0236(2) 0.13165(6) 0.0177(3) Uani 1 1 d . . . 
C27 C 0.02227(10) -0.01166(19) 0.09323(6) 0.0183(3) Uani 1 1 d . . . 
C9 C 0.15819(10) -0.0085(2) 0.15148(6) 0.0193(3) Uani 1 1 d . . . 
C6 C 0.24265(10) -0.0722(2) 0.03944(6) 0.0217(3) Uani 1 1 d . . . 
C29 C -0.07050(10) -0.1797(2) 0.16155(6) 0.0190(3) Uani 1 1 d . . . 
C7 C 0.16444(10) -0.1824(2) 0.06166(6) 0.0196(3) Uani 1 1 d . . . 
C16 C 0.14027(10) -0.4404(2) 0.11920(7) 0.0237(3) Uani 1 1 d . . . 
H16A H 0.1630 -0.5201 0.1497 0.028 Uiso 1 1 calc R . . 
H16B H 0.1091 -0.5102 0.0892 0.028 Uiso 1 1 calc R . . 
C3 C 0.21338(10) -0.3307(2) 0.09368(7) 0.0208(3) Uani 1 1 d . . . 
C2 C 0.26439(10) -0.2498(2) 0.14478(7) 0.0221(3) Uani 1 1 d . . . 
C19 C -0.05447(11) -0.4085(2) 0.08757(7) 0.0251(4) Uani 1 1 d . . . 
H19A H -0.1179 -0.4272 0.0899 0.038 Uiso 1 1 calc R . . 
H19B H -0.0258 -0.5193 0.0776 0.038 Uiso 1 1 calc R . . 
H19C H -0.0426 -0.3206 0.0579 0.038 Uiso 1 1 calc R . . 
C1 C 0.25641(10) -0.0522(2) 0.15047(6) 0.0213(3) Uani 1 1 d . . . 
C30 C -0.13994(10) -0.1812(2) 0.19980(7) 0.0234(3) Uani 1 1 d . . . 
H30 H -0.1523 -0.2852 0.2208 0.028 Uiso 1 1 calc R . . 
C4 C 0.27796(11) -0.3957(2) 0.04909(7) 0.0265(4) Uani 1 1 d . . . 
H4A H 0.2489 -0.4743 0.0206 0.032 Uiso 1 1 calc R . . 
H4B H 0.3278 -0.4587 0.0677 0.032 Uiso 1 1 calc R . . 
C18 C -0.01844(10) -0.3431(2) 0.14634(7) 0.0197(3) Uani 1 1 d . . . 
C17 C 0.08001(10) -0.29584(19) 0.14443(7) 0.0194(3) Uani 1 1 d . . . 
H17 H 0.1000 -0.2770 0.1853 0.023 Uiso 1 1 calc R . . 
C32 C -0.17576(11) 0.1181(2) 0.17686(7) 0.0265(4) Uani 1 1 d . . . 
H32 H -0.2119 0.2184 0.1819 0.032 Uiso 1 1 calc R . . 
C31 C -0.19121(11) -0.0333(2) 0.20771(7) 0.0261(4) Uani 1 1 d . . . 
H31 H -0.2374 -0.0361 0.2346 0.031 Uiso 1 1 calc R . . 
C26 C 0.21979(11) 0.0590(2) -0.00809(7) 0.0269(4) Uani 1 1 d . . . 
H26A H 0.1961 -0.0038 -0.0418 0.040 Uiso 1 1 calc R . . 
H26B H 0.2727 0.1231 -0.0189 0.040 Uiso 1 1 calc R . . 
H26C H 0.1759 0.1420 0.0058 0.040 Uiso 1 1 calc R . . 
C33 C -0.10728(10) 0.1230(2) 0.13849(7) 0.0219(3) Uani 1 1 d . . . 
H33 H -0.0968 0.2265 0.1168 0.026 Uiso 1 1 calc R . . 
C5 C 0.30875(11) -0.2227(2) 0.02036(7) 0.0268(4) Uani 1 1 d . . . 
H5 H 0.3676 -0.1933 0.0375 0.032 Uiso 1 1 calc R . . 
C12 C 0.40460(11) -0.0005(2) 0.20044(7) 0.0280(4) Uani 1 1 d . . . 
H12 H 0.4260 -0.1151 0.2087 0.034 Uiso 1 1 calc R . . 
C13 C 0.46396(11) 0.1206(2) 0.18842(7) 0.0299(4) Uani 1 1 d . . . 
C11 C 0.30650(11) 0.0248(2) 0.20240(7) 0.0276(4) Uani 1 1 d . . . 
H11A H 0.2938 0.1521 0.2046 0.033 Uiso 1 1 calc R . . 
H11B H 0.2846 -0.0304 0.2380 0.033 Uiso 1 1 calc R . . 
C10 C 0.28225(10) 0.0291(2) 0.09161(7) 0.0238(4) Uani 1 1 d . . . 
H10A H 0.2619 0.1525 0.0900 0.029 Uiso 1 1 calc R . . 
H10B H 0.3470 0.0296 0.0889 0.029 Uiso 1 1 calc R . . 
C23 C 0.38437(11) -0.5276(3) -0.08829(7) 0.0314(4) Uani 1 1 d . . . 
C22 C 0.38930(12) -0.3868(3) -0.05483(8) 0.0377(5) Uani 1 1 d . . . 
H22 H 0.4435 -0.3708 -0.0346 0.045 Uiso 1 1 calc R . . 
C20 C -0.02745(11) -0.4874(2) 0.19205(7) 0.0266(4) Uani 1 1 d . . . 
H20A H -0.0102 -0.4406 0.2300 0.040 Uiso 1 1 calc R . . 
H20B H 0.0106 -0.5864 0.1825 0.040 Uiso 1 1 calc R . . 
H20C H -0.0885 -0.5272 0.1929 0.040 Uiso 1 1 calc R . . 
C21 C 0.32074(12) -0.2485(3) -0.04446(8) 0.0360(4) Uani 1 1 d . . . 
H21A H 0.2644 -0.2848 -0.0627 0.043 Uiso 1 1 calc R . . 
H21B H 0.3389 -0.1364 -0.0622 0.043 Uiso 1 1 calc R . . 
C14 C 0.56060(11) 0.0758(3) 0.18869(9) 0.0399(5) Uani 1 1 d . . . 
H14A H 0.5682 -0.0497 0.1965 0.060 Uiso 1 1 calc R . . 
H14B H 0.5912 0.1442 0.2187 0.060 Uiso 1 1 calc R . . 
H14C H 0.5850 0.1040 0.1510 0.060 Uiso 1 1 calc R . . 
C24 C 0.45842(13) -0.6568(3) -0.09208(9) 0.0438(5) Uani 1 1 d . . . 
H24A H 0.5083 -0.6154 -0.0686 0.066 Uiso 1 1 calc R . . 
H24B H 0.4761 -0.6680 -0.1323 0.066 Uiso 1 1 calc R . . 
H24C H 0.4392 -0.7714 -0.0778 0.066 Uiso 1 1 calc R . . 
C15 C 0.44354(13) 0.3067(3) 0.17253(9) 0.0437(5) Uani 1 1 d . . . 
H15A H 0.4539 0.3243 0.1313 0.066 Uiso 1 1 calc R . . 
H15B H 0.4814 0.3858 0.1952 0.066 Uiso 1 1 calc R . . 
H15C H 0.3820 0.3318 0.1807 0.066 Uiso 1 1 calc R . . 
C25 C 0.30705(13) -0.5752(3) -0.12597(9) 0.0462(5) Uani 1 1 d . . . 
H25A H 0.2616 -0.4851 -0.1225 0.069 Uiso 1 1 calc R . . 
H25B H 0.2836 -0.6889 -0.1138 0.069 Uiso 1 1 calc R . . 
H25C H 0.3254 -0.5828 -0.1662 0.069 Uiso 1 1 calc R . . 
 
loop_ 
 _atom_site_aniso_label 
 _atom_site_aniso_U_11 
 _atom_site_aniso_U_22 
 _atom_site_aniso_U_33 
 _atom_site_aniso_U_23 
 _atom_site_aniso_U_13 
 _atom_site_aniso_U_12 
O1 0.0252(6) 0.0254(6) 0.0223(6) 0.0073(5) 0.0013(5) 0.0033(5) 
O2 0.0236(6) 0.0302(6) 0.0273(6) -0.0096(5) 0.0007(5) -0.0003(5) 
O3 0.0266(6) 0.0258(6) 0.0190(6) -0.0041(5) -0.0049(5) 0.0049(5) 
O4 0.0279(6) 0.0364(7) 0.0299(6) 0.0075(6) -0.0057(5) 0.0044(5) 
C8 0.0179(7) 0.0176(7) 0.0159(7) 0.0008(6) -0.0004(6) 0.0014(6) 
C28 0.0171(7) 0.0206(8) 0.0154(7) -0.0020(6) -0.0029(6) -0.0011(6) 
C27 0.0212(8) 0.0155(7) 0.0182(7) -0.0018(6) -0.0023(6) -0.0004(6) 
C9 0.0211(8) 0.0217(8) 0.0153(7) 0.0028(6) 0.0029(6) -0.0010(6) 
C6 0.0208(8) 0.0277(9) 0.0167(7) 0.0010(7) 0.0024(6) 0.0034(7) 
C29 0.0187(7) 0.0213(8) 0.0170(7) -0.0005(6) -0.0038(6) -0.0013(6) 
C7 0.0206(8) 0.0220(8) 0.0162(7) -0.0019(6) -0.0007(6) 0.0024(6) 
C16 0.0255(8) 0.0189(8) 0.0266(8) 0.0013(7) -0.0003(7) 0.0037(6) 
C3 0.0212(8) 0.0210(8) 0.0202(8) 0.0005(6) 0.0004(6) 0.0055(6) 
C2 0.0168(8) 0.0310(9) 0.0186(8) 0.0036(7) 0.0032(6) 0.0027(7) 
C19 0.0253(8) 0.0238(8) 0.0260(8) -0.0013(7) -0.0012(7) -0.0023(7) 
C1 0.0174(8) 0.0292(9) 0.0172(7) -0.0002(6) 0.0000(6) -0.0001(6) 
C30 0.0221(8) 0.0264(9) 0.0217(8) 0.0025(7) 0.0003(6) -0.0036(7) 
C4 0.0251(8) 0.0285(9) 0.0259(9) -0.0028(7) 0.0022(7) 0.0084(7) 
C18 0.0210(8) 0.0166(7) 0.0214(8) 0.0007(6) 0.0002(6) -0.0014(6) 
C17 0.0207(8) 0.0193(8) 0.0182(7) 0.0027(6) -0.0013(6) 0.0011(6) 
C32 0.0226(8) 0.0259(9) 0.0311(9) -0.0052(7) 0.0021(7) 0.0038(7) 
C31 0.0206(8) 0.0344(10) 0.0234(8) -0.0030(7) 0.0039(7) -0.0021(7) 
C26 0.0265(9) 0.0335(9) 0.0208(8) 0.0046(7) 0.0025(7) 0.0018(7) 
C33 0.0222(8) 0.0197(8) 0.0239(8) 0.0002(6) -0.0004(6) 0.0003(6) 
C5 0.0239(8) 0.0346(9) 0.0221(8) -0.0012(7) 0.0031(7) 0.0066(7) 
C12 0.0226(9) 0.0353(10) 0.0257(9) -0.0043(7) -0.0058(7) 0.0014(7) 
C13 0.0240(9) 0.0401(10) 0.0255(9) -0.0067(8) -0.0018(7) -0.0004(8) 
C11 0.0232(9) 0.0390(10) 0.0207(8) -0.0025(7) -0.0023(7) -0.0022(7) 
C10 0.0201(8) 0.0298(9) 0.0217(8) 0.0015(7) 0.0023(6) -0.0028(7) 
C23 0.0274(9) 0.0425(11) 0.0245(9) 0.0010(8) 0.0049(7) 0.0042(8) 
C22 0.0264(9) 0.0542(12) 0.0326(10) -0.0097(9) 0.0050(8) 0.0065(9) 
C20 0.0296(9) 0.0226(8) 0.0276(9) 0.0058(7) 0.0032(7) -0.0011(7) 
C21 0.0375(10) 0.0458(11) 0.0250(9) -0.0035(8) 0.0070(8) 0.0093(9) 
C14 0.0248(9) 0.0553(13) 0.0396(11) -0.0095(10) 0.0002(8) -0.0021(9) 
C24 0.0396(11) 0.0493(12) 0.0425(11) -0.0105(10) 0.0028(9) 0.0109(9) 
C15 0.0359(11) 0.0420(12) 0.0531(13) -0.0002(10) -0.0006(9) -0.0053(9) 
C25 0.0410(12) 0.0524(13) 0.0450(12) -0.0030(10) -0.0076(10) 0.0012(10) 
 
_geom_special_details 
; 
 All esds (except the esd in the dihedral angle between two l.s. planes) 
 are estimated using the full covariance matrix.  The cell esds are taken 
 into account individually in the estimation of esds in distances, angles 
 and torsion angles; correlations between esds in cell parameters are only 
 used when they are defined by crystal symmetry.  An approximate (isotropic) 
 treatment of cell esds is used for estimating esds involving l.s. planes. 
; 
 
loop_ 
 _geom_bond_atom_site_label_1 
 _geom_bond_atom_site_label_2 
 _geom_bond_distance 
 _geom_bond_site_symmetry_2 
 _geom_bond_publ_flag 
O1 C27 1.2237(17) . ? 
O2 C9 1.2102(18) . ? 
O3 C7 1.4201(18) . ? 
O3 H3 0.8400 . ? 
O4 C2 1.2137(19) . ? 
C8 C27 1.522(2) . ? 
C8 C9 1.525(2) . ? 
C8 C7 1.555(2) . ? 
C8 C17 1.600(2) . ? 
C28 C33 1.394(2) . ? 
C28 C29 1.402(2) . ? 
C28 C27 1.479(2) . ? 
C9 C1 1.535(2) . ? 
C6 C26 1.523(2) . ? 
C6 C10 1.548(2) . ? 
C6 C7 1.554(2) . ? 
C6 C5 1.595(2) . ? 
C29 C30 1.394(2) . ? 
C29 C18 1.522(2) . ? 
C7 C3 1.537(2) . ? 
C16 C3 1.522(2) . ? 
C16 C17 1.556(2) . ? 
C16 H16A 0.9900 . ? 
C16 H16B 0.9900 . ? 
C3 C4 1.524(2) . ? 
C3 C2 1.534(2) . ? 
C2 C1 1.516(2) . ? 
C19 C18 1.542(2) . ? 
C19 H19A 0.9800 . ? 
C19 H19B 0.9800 . ? 
C19 H19C 0.9800 . ? 
C1 C11 1.530(2) . ? 
C1 C10 1.556(2) . ? 
C30 C31 1.385(2) . ? 
C30 H30 0.9500 . ? 
C4 C5 1.553(2) . ? 
C4 H4A 0.9900 . ? 
C4 H4B 0.9900 . ? 
C18 C20 1.535(2) . ? 
C18 C17 1.545(2) . ? 
C17 H17 1.0000 . ? 
C32 C31 1.380(2) . ? 
C32 C33 1.385(2) . ? 
C32 H32 0.9500 . ? 
C31 H31 0.9500 . ? 
C26 H26A 0.9800 . ? 
C26 H26B 0.9800 . ? 
C26 H26C 0.9800 . ? 
C33 H33 0.9500 . ? 
C5 C21 1.530(2) . ? 
C5 H5 1.0000 . ? 
C12 C13 1.326(2) . ? 
C12 C11 1.510(2) . ? 
C12 H12 0.9500 . ? 
C13 C15 1.496(3) . ? 
C13 C14 1.513(2) . ? 
C11 H11A 0.9900 . ? 
C11 H11B 0.9900 . ? 
C10 H10A 0.9900 . ? 
C10 H10B 0.9900 . ? 
C23 C22 1.325(3) . ? 
C23 C25 1.498(3) . ? 
C23 C24 1.502(3) . ? 
C22 C21 1.506(3) . ? 
C22 H22 0.9500 . ? 
C20 H20A 0.9800 . ? 
C20 H20B 0.9800 . ? 
C20 H20C 0.9800 . ? 
C21 H21A 0.9900 . ? 
C21 H21B 0.9900 . ? 
C14 H14A 0.9800 . ? 
C14 H14B 0.9800 . ? 
C14 H14C 0.9800 . ? 
C24 H24A 0.9800 . ? 
C24 H24B 0.9800 . ? 
C24 H24C 0.9800 . ? 
C15 H15A 0.9800 . ? 
C15 H15B 0.9800 . ? 
C15 H15C 0.9800 . ? 
C25 H25A 0.9800 . ? 
C25 H25B 0.9800 . ? 
C25 H25C 0.9800 . ? 
 
loop_ 
 _geom_angle_atom_site_label_1 
 _geom_angle_atom_site_label_2 
 _geom_angle_atom_site_label_3 
 _geom_angle 
 _geom_angle_site_symmetry_1 
 _geom_angle_site_symmetry_3 
 _geom_angle_publ_flag 
C7 O3 H3 109.5 . . ? 
C27 C8 C9 107.20(12) . . ? 
C27 C8 C7 118.41(12) . . ? 
C9 C8 C7 106.71(12) . . ? 
C27 C8 C17 113.69(12) . . ? 
C9 C8 C17 106.03(11) . . ? 
C7 C8 C17 104.00(12) . . ? 
C33 C28 C29 120.74(14) . . ? 
C33 C28 C27 119.14(14) . . ? 
C29 C28 C27 120.12(13) . . ? 
O1 C27 C28 122.69(14) . . ? 
O1 C27 C8 120.48(13) . . ? 
C28 C27 C8 116.65(13) . . ? 
O2 C9 C8 123.76(14) . . ? 
O2 C9 C1 122.51(14) . . ? 
C8 C9 C1 113.62(12) . . ? 
C26 C6 C10 108.57(13) . . ? 
C26 C6 C7 115.33(13) . . ? 
C10 C6 C7 107.50(12) . . ? 
C26 C6 C5 114.10(12) . . ? 
C10 C6 C5 109.63(13) . . ? 
C7 C6 C5 101.35(12) . . ? 
C30 C29 C28 117.95(14) . . ? 
C30 C29 C18 123.14(14) . . ? 
C28 C29 C18 118.61(13) . . ? 
O3 C7 C3 107.47(12) . . ? 
O3 C7 C6 111.44(12) . . ? 
C3 C7 C6 100.86(12) . . ? 
O3 C7 C8 111.10(12) . . ? 
C3 C7 C8 99.87(11) . . ? 
C6 C7 C8 123.61(13) . . ? 
C3 C16 C17 101.53(12) . . ? 
C3 C16 H16A 111.5 . . ? 
C17 C16 H16A 111.5 . . ? 
C3 C16 H16B 111.5 . . ? 
C17 C16 H16B 111.5 . . ? 
H16A C16 H16B 109.3 . . ? 
C16 C3 C4 124.95(14) . . ? 
C16 C3 C2 106.53(12) . . ? 
C4 C3 C2 109.26(13) . . ? 
C16 C3 C7 103.81(12) . . ? 
C4 C3 C7 103.02(12) . . ? 
C2 C3 C7 108.20(13) . . ? 
O4 C2 C1 123.47(15) . . ? 
O4 C2 C3 121.32(15) . . ? 
C1 C2 C3 115.20(13) . . ? 
C18 C19 H19A 109.5 . . ? 
C18 C19 H19B 109.5 . . ? 
H19A C19 H19B 109.5 . . ? 
C18 C19 H19C 109.5 . . ? 
H19A C19 H19C 109.5 . . ? 
H19B C19 H19C 109.5 . . ? 
C2 C1 C11 114.18(14) . . ? 
C2 C1 C9 107.23(13) . . ? 
C11 C1 C9 112.18(13) . . ? 
C2 C1 C10 107.26(13) . . ? 
C11 C1 C10 113.98(13) . . ? 
C9 C1 C10 100.98(12) . . ? 
C31 C30 C29 121.00(15) . . ? 
C31 C30 H30 119.5 . . ? 
C29 C30 H30 119.5 . . ? 
C3 C4 C5 102.68(13) . . ? 
C3 C4 H4A 111.2 . . ? 
C5 C4 H4A 111.2 . . ? 
C3 C4 H4B 111.2 . . ? 
C5 C4 H4B 111.2 . . ? 
H4A C4 H4B 109.1 . . ? 
C29 C18 C20 111.83(13) . . ? 
C29 C18 C19 106.88(12) . . ? 
C20 C18 C19 110.11(13) . . ? 
C29 C18 C17 109.10(12) . . ? 
C20 C18 C17 106.65(13) . . ? 
C19 C18 C17 112.33(12) . . ? 
C18 C17 C16 115.27(13) . . ? 
C18 C17 C8 115.37(12) . . ? 
C16 C17 C8 105.77(12) . . ? 
C18 C17 H17 106.6 . . ? 
C16 C17 H17 106.6 . . ? 
C8 C17 H17 106.6 . . ? 
C31 C32 C33 119.60(15) . . ? 
C31 C32 H32 120.2 . . ? 
C33 C32 H32 120.2 . . ? 
C32 C31 C30 120.57(15) . . ? 
C32 C31 H31 119.7 . . ? 
C30 C31 H31 119.7 . . ? 
C6 C26 H26A 109.5 . . ? 
C6 C26 H26B 109.5 . . ? 
H26A C26 H26B 109.5 . . ? 
C6 C26 H26C 109.5 . . ? 
H26A C26 H26C 109.5 . . ? 
H26B C26 H26C 109.5 . . ? 
C32 C33 C28 120.09(15) . . ? 
C32 C33 H33 120.0 . . ? 
C28 C33 H33 120.0 . . ? 
C21 C5 C4 110.79(15) . . ? 
C21 C5 C6 116.92(14) . . ? 
C4 C5 C6 107.05(12) . . ? 
C21 C5 H5 107.2 . . ? 
C4 C5 H5 107.2 . . ? 
C6 C5 H5 107.2 . . ? 
C13 C12 C11 126.74(17) . . ? 
C13 C12 H12 116.6 . . ? 
C11 C12 H12 116.6 . . ? 
C12 C13 C15 124.85(17) . . ? 
C12 C13 C14 120.73(17) . . ? 
C15 C13 C14 114.40(16) . . ? 
C12 C11 C1 114.02(13) . . ? 
C12 C11 H11A 108.7 . . ? 
C1 C11 H11A 108.7 . . ? 
C12 C11 H11B 108.7 . . ? 
C1 C11 H11B 108.7 . . ? 
H11A C11 H11B 107.6 . . ? 
C6 C10 C1 112.66(13) . . ? 
C6 C10 H10A 109.1 . . ? 
C1 C10 H10A 109.1 . . ? 
C6 C10 H10B 109.1 . . ? 
C1 C10 H10B 109.1 . . ? 
H10A C10 H10B 107.8 . . ? 
C22 C23 C25 124.91(17) . . ? 
C22 C23 C24 122.03(17) . . ? 
C25 C23 C24 113.06(17) . . ? 
C23 C22 C21 128.87(18) . . ? 
C23 C22 H22 115.6 . . ? 
C21 C22 H22 115.6 . . ? 
C18 C20 H20A 109.5 . . ? 
C18 C20 H20B 109.5 . . ? 
H20A C20 H20B 109.5 . . ? 
C18 C20 H20C 109.5 . . ? 
H20A C20 H20C 109.5 . . ? 
H20B C20 H20C 109.5 . . ? 
C22 C21 C5 110.05(15) . . ? 
C22 C21 H21A 109.7 . . ? 
C5 C21 H21A 109.7 . . ? 
C22 C21 H21B 109.7 . . ? 
C5 C21 H21B 109.6 . . ? 
H21A C21 H21B 108.2 . . ? 
C13 C14 H14A 109.5 . . ? 
C13 C14 H14B 109.5 . . ? 
H14A C14 H14B 109.5 . . ? 
C13 C14 H14C 109.5 . . ? 
H14A C14 H14C 109.5 . . ? 
H14B C14 H14C 109.5 . . ? 
C23 C24 H24A 109.5 . . ? 
C23 C24 H24B 109.5 . . ? 
H24A C24 H24B 109.5 . . ? 
C23 C24 H24C 109.5 . . ? 
H24A C24 H24C 109.5 . . ? 
H24B C24 H24C 109.5 . . ? 
C13 C15 H15A 109.5 . . ? 
C13 C15 H15B 109.5 . . ? 
H15A C15 H15B 109.5 . . ? 
C13 C15 H15C 109.5 . . ? 
H15A C15 H15C 109.5 . . ? 
H15B C15 H15C 109.5 . . ? 
C23 C25 H25A 109.5 . . ? 
C23 C25 H25B 109.5 . . ? 
H25A C25 H25B 109.5 . . ? 
C23 C25 H25C 109.5 . . ? 
H25A C25 H25C 109.5 . . ? 
H25B C25 H25C 109.5 . . ? 
 
loop_ 
 _geom_torsion_atom_site_label_1 
 _geom_torsion_atom_site_label_2 
 _geom_torsion_atom_site_label_3 
 _geom_torsion_atom_site_label_4 
 _geom_torsion 
 _geom_torsion_site_symmetry_1 
 _geom_torsion_site_symmetry_2 
 _geom_torsion_site_symmetry_3 
 _geom_torsion_site_symmetry_4 
 _geom_torsion_publ_flag 
C33 C28 C27 O1 -27.9(2) . . . . ? 
C29 C28 C27 O1 153.30(15) . . . . ? 
C33 C28 C27 C8 147.22(14) . . . . ? 
C29 C28 C27 C8 -31.55(19) . . . . ? 
C9 C8 C27 O1 88.24(16) . . . . ? 
C7 C8 C27 O1 -32.4(2) . . . . ? 
C17 C8 C27 O1 -154.93(14) . . . . ? 
C9 C8 C27 C28 -87.03(15) . . . . ? 
C7 C8 C27 C28 152.34(13) . . . . ? 
C17 C8 C27 C28 29.81(18) . . . . ? 
C27 C8 C9 O2 23.92(19) . . . . ? 
C7 C8 C9 O2 151.73(14) . . . . ? 
C17 C8 C9 O2 -97.85(16) . . . . ? 
C27 C8 C9 C1 -152.46(12) . . . . ? 
C7 C8 C9 C1 -24.66(16) . . . . ? 
C17 C8 C9 C1 85.77(14) . . . . ? 
C33 C28 C29 C30 -2.4(2) . . . . ? 
C27 C28 C29 C30 176.34(13) . . . . ? 
C33 C28 C29 C18 171.51(14) . . . . ? 
C27 C28 C29 C18 -9.8(2) . . . . ? 
C26 C6 C7 O3 50.18(17) . . . . ? 
C10 C6 C7 O3 171.43(12) . . . . ? 
C5 C6 C7 O3 -73.58(14) . . . . ? 
C26 C6 C7 C3 164.00(13) . . . . ? 
C10 C6 C7 C3 -74.76(14) . . . . ? 
C5 C6 C7 C3 40.24(14) . . . . ? 
C26 C6 C7 C8 -86.31(18) . . . . ? 
C10 C6 C7 C8 34.94(19) . . . . ? 
C5 C6 C7 C8 149.94(13) . . . . ? 
C27 C8 C7 O3 -48.35(17) . . . . ? 
C9 C8 C7 O3 -169.24(12) . . . . ? 
C17 C8 C7 O3 78.93(14) . . . . ? 
C27 C8 C7 C3 -161.54(13) . . . . ? 
C9 C8 C7 C3 77.57(13) . . . . ? 
C17 C8 C7 C3 -34.26(14) . . . . ? 
C27 C8 C7 C6 88.26(17) . . . . ? 
C9 C8 C7 C6 -32.62(18) . . . . ? 
C17 C8 C7 C6 -144.46(14) . . . . ? 
C17 C16 C3 C4 -162.20(14) . . . . ? 
C17 C16 C3 C2 68.96(14) . . . . ? 
C17 C16 C3 C7 -45.15(14) . . . . ? 
O3 C7 C3 C16 -65.75(14) . . . . ? 
C6 C7 C3 C16 177.48(12) . . . . ? 
C8 C7 C3 C16 50.22(14) . . . . ? 
O3 C7 C3 C4 65.73(15) . . . . ? 
C6 C7 C3 C4 -51.05(14) . . . . ? 
C8 C7 C3 C4 -178.31(12) . . . . ? 
O3 C7 C3 C2 -178.65(11) . . . . ? 
C6 C7 C3 C2 64.57(14) . . . . ? 
C8 C7 C3 C2 -62.69(14) . . . . ? 
C16 C3 C2 O4 66.27(18) . . . . ? 
C4 C3 C2 O4 -71.18(18) . . . . ? 
C7 C3 C2 O4 177.34(14) . . . . ? 
C16 C3 C2 C1 -112.33(14) . . . . ? 
C4 C3 C2 C1 110.23(15) . . . . ? 
C7 C3 C2 C1 -1.25(17) . . . . ? 
O4 C2 C1 C11 0.4(2) . . . . ? 
C3 C2 C1 C11 178.93(12) . . . . ? 
O4 C2 C1 C9 -124.56(16) . . . . ? 
C3 C2 C1 C9 54.00(16) . . . . ? 
O4 C2 C1 C10 127.67(16) . . . . ? 
C3 C2 C1 C10 -53.77(16) . . . . ? 
O2 C9 C1 C2 144.68(15) . . . . ? 
C8 C9 C1 C2 -38.88(16) . . . . ? 
O2 C9 C1 C11 18.6(2) . . . . ? 
C8 C9 C1 C11 -165.00(13) . . . . ? 
O2 C9 C1 C10 -103.19(16) . . . . ? 
C8 C9 C1 C10 73.24(15) . . . . ? 
C28 C29 C30 C31 0.4(2) . . . . ? 
C18 C29 C30 C31 -173.19(14) . . . . ? 
C16 C3 C4 C5 157.05(15) . . . . ? 
C2 C3 C4 C5 -75.22(15) . . . . ? 
C7 C3 C4 C5 39.63(15) . . . . ? 
C30 C29 C18 C20 -20.6(2) . . . . ? 
C28 C29 C18 C20 165.81(13) . . . . ? 
C30 C29 C18 C19 99.96(16) . . . . ? 
C28 C29 C18 C19 -73.61(16) . . . . ? 
C30 C29 C18 C17 -138.36(15) . . . . ? 
C28 C29 C18 C17 48.07(18) . . . . ? 
C29 C18 C17 C16 -169.88(12) . . . . ? 
C20 C18 C17 C16 69.16(16) . . . . ? 
C19 C18 C17 C16 -51.56(17) . . . . ? 
C29 C18 C17 C8 -46.07(17) . . . . ? 
C20 C18 C17 C8 -167.03(12) . . . . ? 
C19 C18 C17 C8 72.25(16) . . . . ? 
C3 C16 C17 C18 150.74(13) . . . . ? 
C3 C16 C17 C8 22.02(15) . . . . ? 
C27 C8 C17 C18 9.42(18) . . . . ? 
C9 C8 C17 C18 126.93(13) . . . . ? 
C7 C8 C17 C18 -120.74(13) . . . . ? 
C27 C8 C17 C16 138.09(13) . . . . ? 
C9 C8 C17 C16 -104.40(13) . . . . ? 
C7 C8 C17 C16 7.93(15) . . . . ? 
C33 C32 C31 C30 -1.3(3) . . . . ? 
C29 C30 C31 C32 1.4(2) . . . . ? 
C31 C32 C33 C28 -0.7(2) . . . . ? 
C29 C28 C33 C32 2.6(2) . . . . ? 
C27 C28 C33 C32 -176.17(14) . . . . ? 
C3 C4 C5 C21 -142.22(14) . . . . ? 
C3 C4 C5 C6 -13.70(16) . . . . ? 
C26 C6 C5 C21 -16.3(2) . . . . ? 
C10 C6 C5 C21 -138.34(15) . . . . ? 
C7 C6 C5 C21 108.26(16) . . . . ? 
C26 C6 C5 C4 -141.22(14) . . . . ? 
C10 C6 C5 C4 96.77(15) . . . . ? 
C7 C6 C5 C4 -16.63(15) . . . . ? 
C11 C12 C13 C15 -2.0(3) . . . . ? 
C11 C12 C13 C14 179.39(16) . . . . ? 
C13 C12 C11 C1 105.1(2) . . . . ? 
C2 C1 C11 C12 63.07(19) . . . . ? 
C9 C1 C11 C12 -174.67(14) . . . . ? 
C10 C1 C11 C12 -60.68(19) . . . . ? 
C26 C6 C10 C1 144.78(13) . . . . ? 
C7 C6 C10 C1 19.39(17) . . . . ? 
C5 C6 C10 C1 -89.97(15) . . . . ? 
C2 C1 C10 C6 42.78(17) . . . . ? 
C11 C1 C10 C6 170.19(13) . . . . ? 
C9 C1 C10 C6 -69.33(16) . . . . ? 
C25 C23 C22 C21 2.7(3) . . . . ? 
C24 C23 C22 C21 -177.70(19) . . . . ? 
C23 C22 C21 C5 128.7(2) . . . . ? 
C4 C5 C21 C22 -60.7(2) . . . . ? 
C6 C5 C21 C22 176.32(15) . . . . ? 
 
_diffrn_measured_fraction_theta_max    0.911 
_diffrn_reflns_theta_full              27.00 
_diffrn_measured_fraction_theta_full   0.997 
_refine_diff_density_max    0.309 
_refine_diff_density_min   -0.241 
_refine_diff_density_rms    0.048 
